# Supplementary material for: Utilization of Chicken Eggshells as a Source of Calcium to Enhance the Nutritional Value and Quality Characteristics of Crackers
Source: Research Square preprint supplement (doi:10.21203/rs.3.rs-5398539/v1), 2024-12-23
Supplement: Supplementary file 1 [file 4fb8609c4f49f8971dd41637.docx]

**Table 1S: Microbiological quality of CEsP (CFU/g)**

| **Test** | **Values** |
| --- | --- |
| **TBC (Total bacterial count)** | ND |
| ***Coliform*** | ND |
| ***Salmonella*** | ND |
| ***Staphylococcus*** | ND |

* ND = Not detected

Table 2S: The amount of fortified crackers (8% replacement ratio of WF by CEsP) needed to provide the recommended Dietary Allowances of calcium:

| **Age** | **Recommended Calcium intake**  **(mg/day)** | **8% eggshells fortified crackers amount (g)** |
| --- | --- | --- |
| **4-8 years** | 1000 | 135.0 |
| **9-18 years** | 1300 | 175.5 |
| **19-50 years** | 1000 | 135.0 |
| **50-70 years** | 1200 | 162.0 |
| **˃ 70 years** | 1200 | 162.0 |
